# Supplementary material for: Direct profiling of the phospholipid composition of adult Caenorhabditis elegans using whole-body imaging mass spectrometry
Source: PubMed Central journal article supplement (PMC4575384; doi:10.1007/s00216-015-8932-7), 2015-08-27
Supplement: 216_2015_8932_MOESM1_ESM.pdf [file 216_2015_8932_MOESM1_ESM.pdf]

# Analytical and Bioanalytical Chemistry

## Electronic Supplementary Material

### Direct profiling of the phospholipid composition of adult *Caenorhabditis elegans* using whole-body imaging mass spectrometry

Saira Hameed, Koji Ikegami, Eiji Sugiyama, Shoko Matsushita, Yoshishige Kimura, Takahiro Hayasaka, Yuki Sugiura, Noritaka Masaki, Michihiko Waki, Isao Ohta, Md Amir Hossen, Mitsutoshi Setou

EIC (negative ion mode)

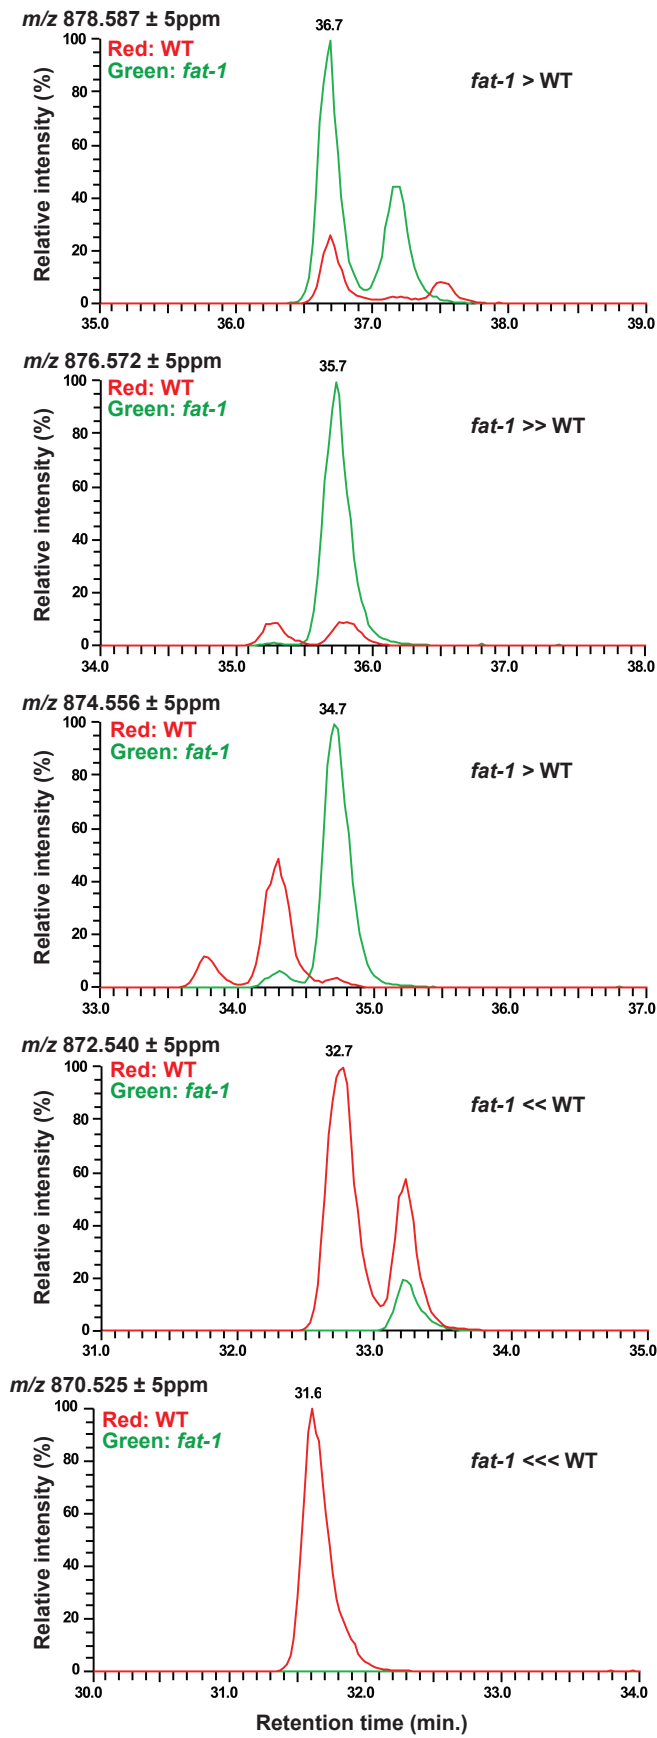

**Fig. S1** Merged EICs acquired through the scanning between  $m/z$  700 to 900 by a hybrid quadrupole-Orbitrap mass spectrometer in negative ion mode. Red, WT; green, *fat-1* mutant.

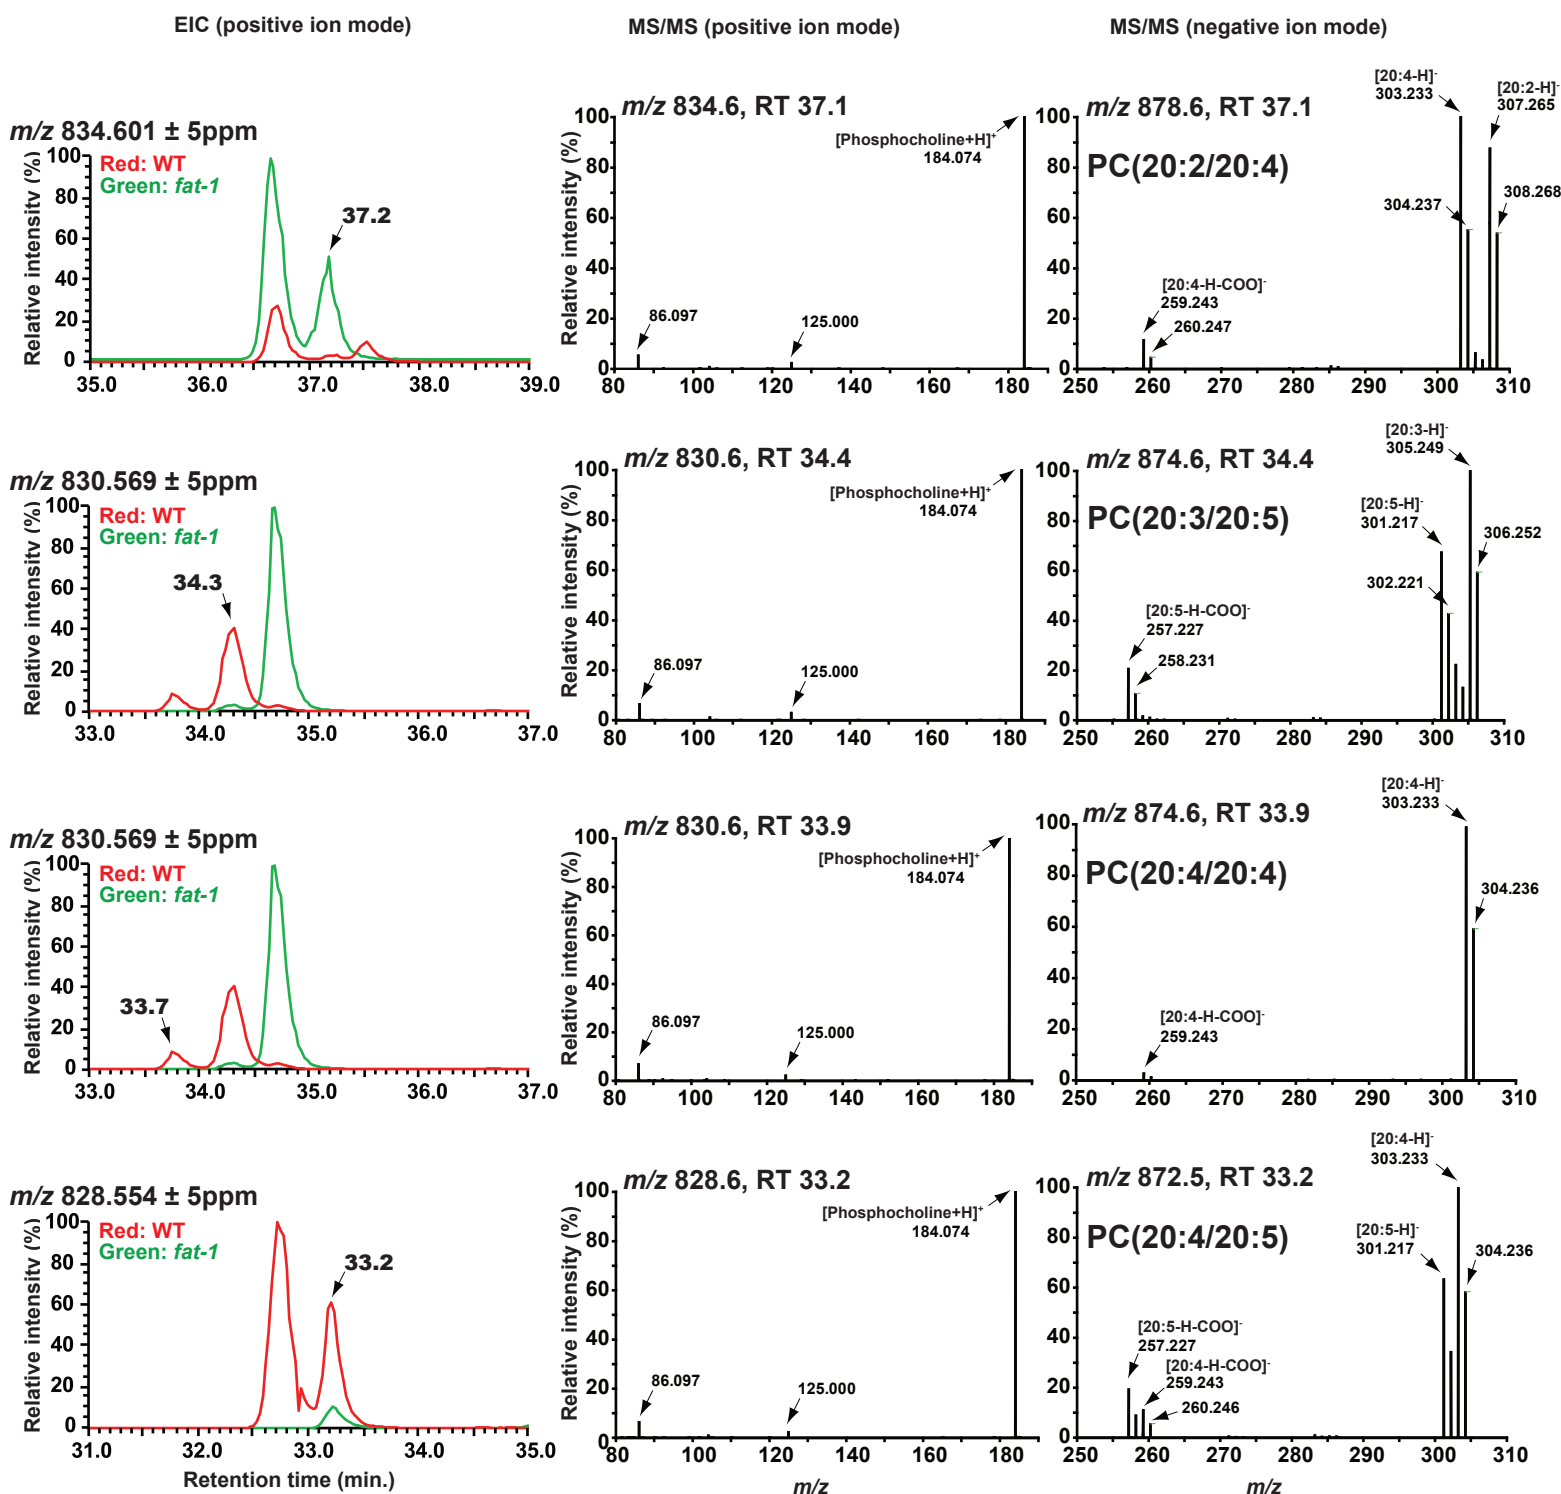

**Fig. S2** (Left column) Merged EICs acquired through the scanning between  $m/z$  700 to 900 by a hybrid quadrupole-Orbitrap mass spectrometer. Red, WT; green, *fat-1* mutant. (Middle column) MS/MS spectra at near peak top of picked peaks acquired by targeted MS/MS in positive ion mode.  $[M+H]^+$  ions produced a common fragment ion at  $m/z$  184.074 [phosphocholine+H]<sup>+</sup>. (Right column) MS/MS spectra at near peak top of picked peaks acquired by targeted MS/MS in negative ion mode.  $[M+HCOO]^-$  ions produced fragment ions depending on their fatty acid composition.
